# Supplementary material
Source: ML conference proceedings conference paper supplement (https://openreview.net/forum?id=g6zcauIP17r)

CIFAR\_AlexNet: Affine Shift,  $\|\delta\|_2 = 1.0$ 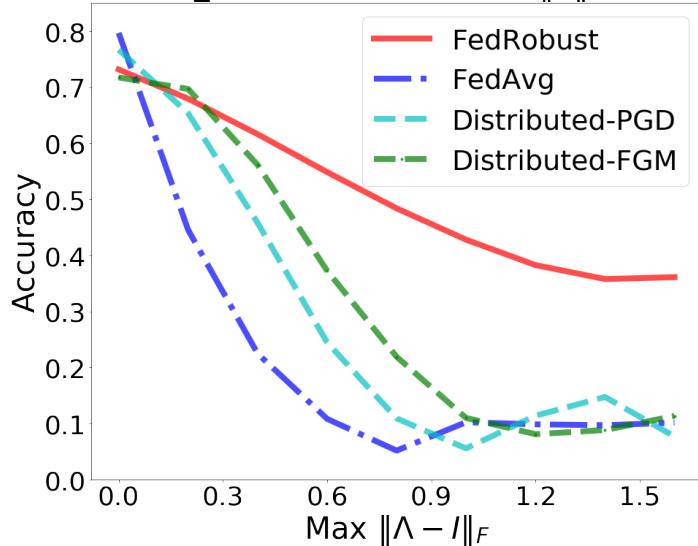CIFAR\_Inception: Affine Shift,  $\|\delta\|_2 = 1.0$ 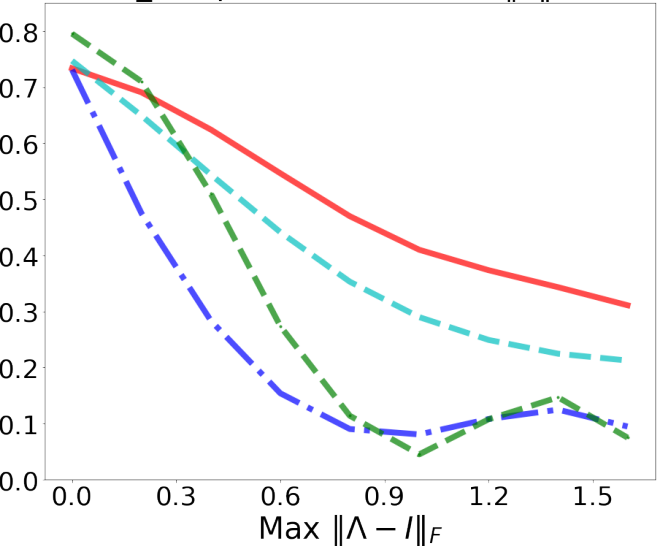CIFAR\_ResNet: Affine Shift,  $\|\delta\|_2 = 1.0$ 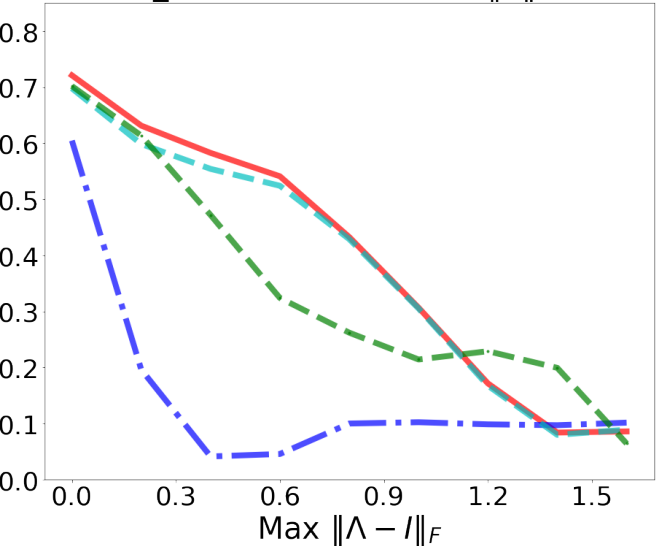CIFAR\_AlexNet: Affine Shift,  $\|\Lambda - I\|_F = 0.4$ 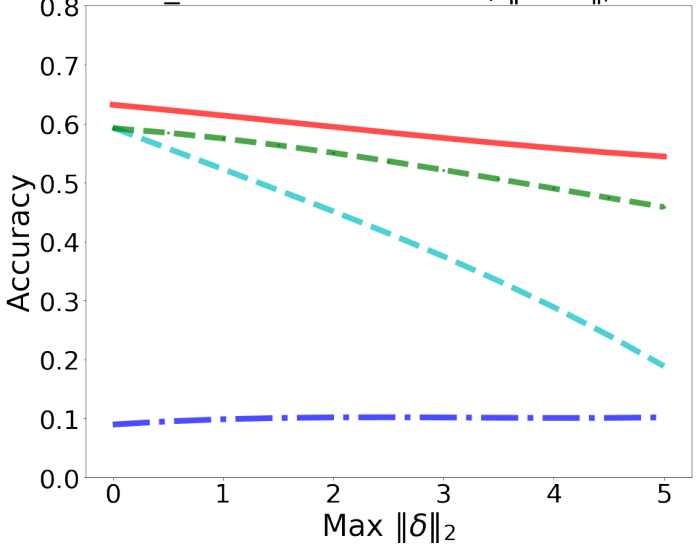CIFAR\_Inception: Affine Shift,  $\|\Lambda - I\|_F = 0.4$ 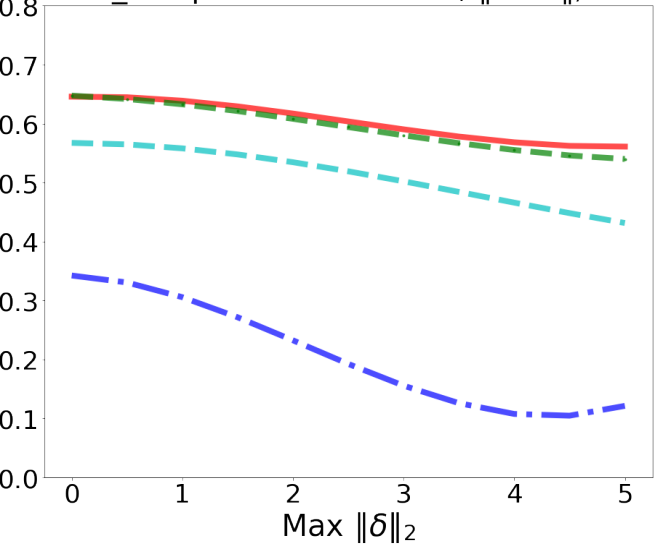CIFAR\_ResNet: Affine Shift,  $\|\Lambda - I\|_F = 0.4$ 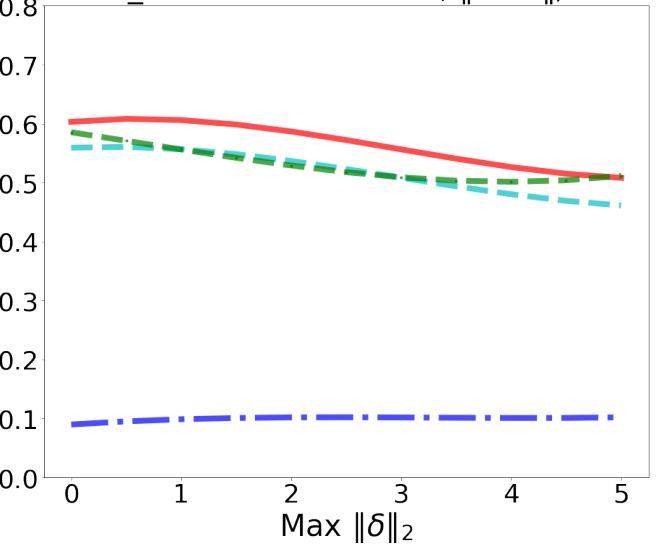

Supplement: supplementary_material [file attachment]
