# Supplementary material
Source: ML conference proceedings conference paper supplement (https://openreview.net/forum?id=g6zcauIP17r)

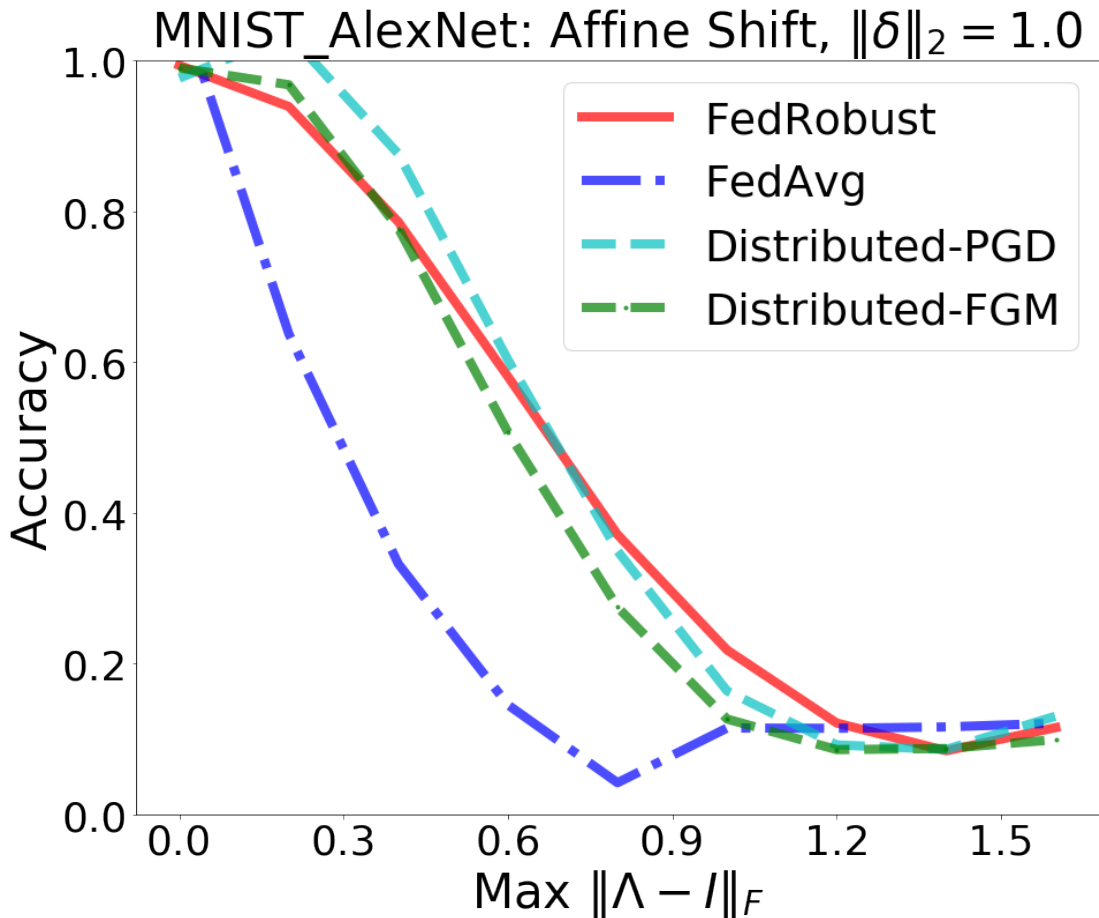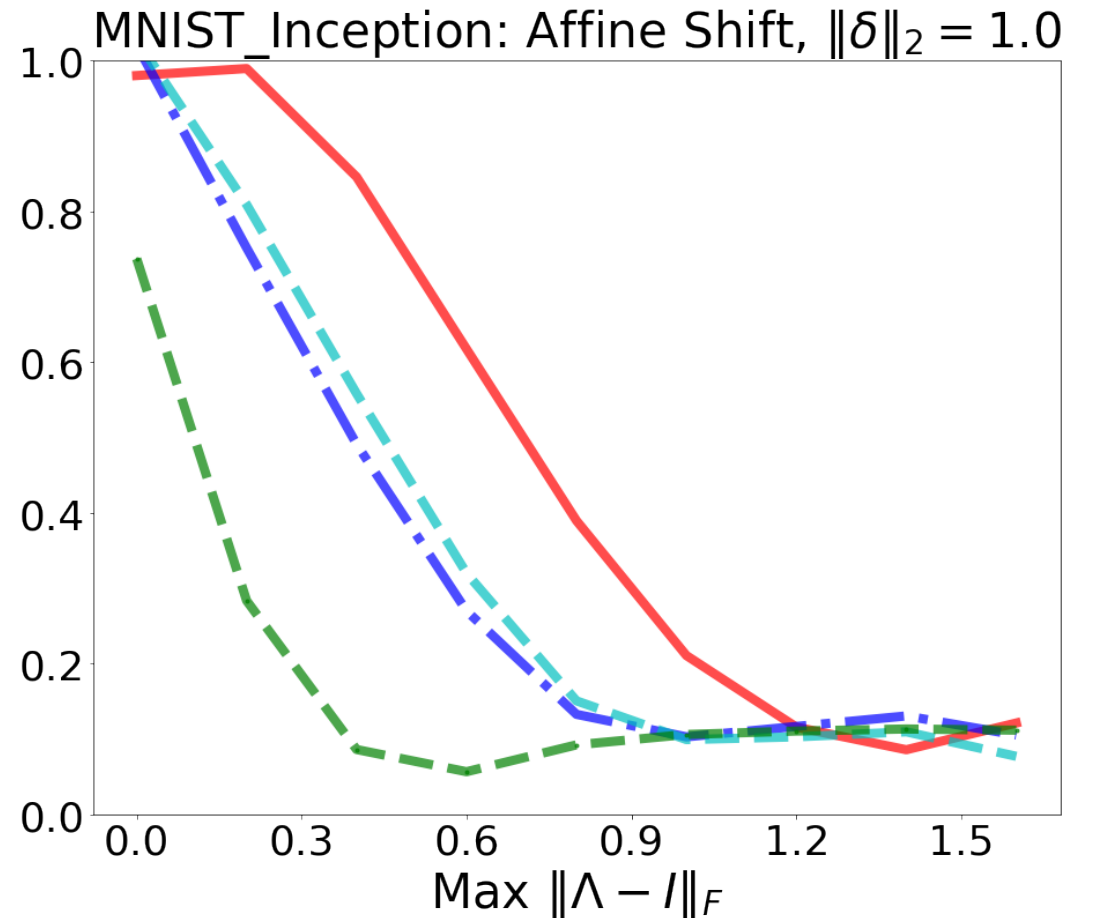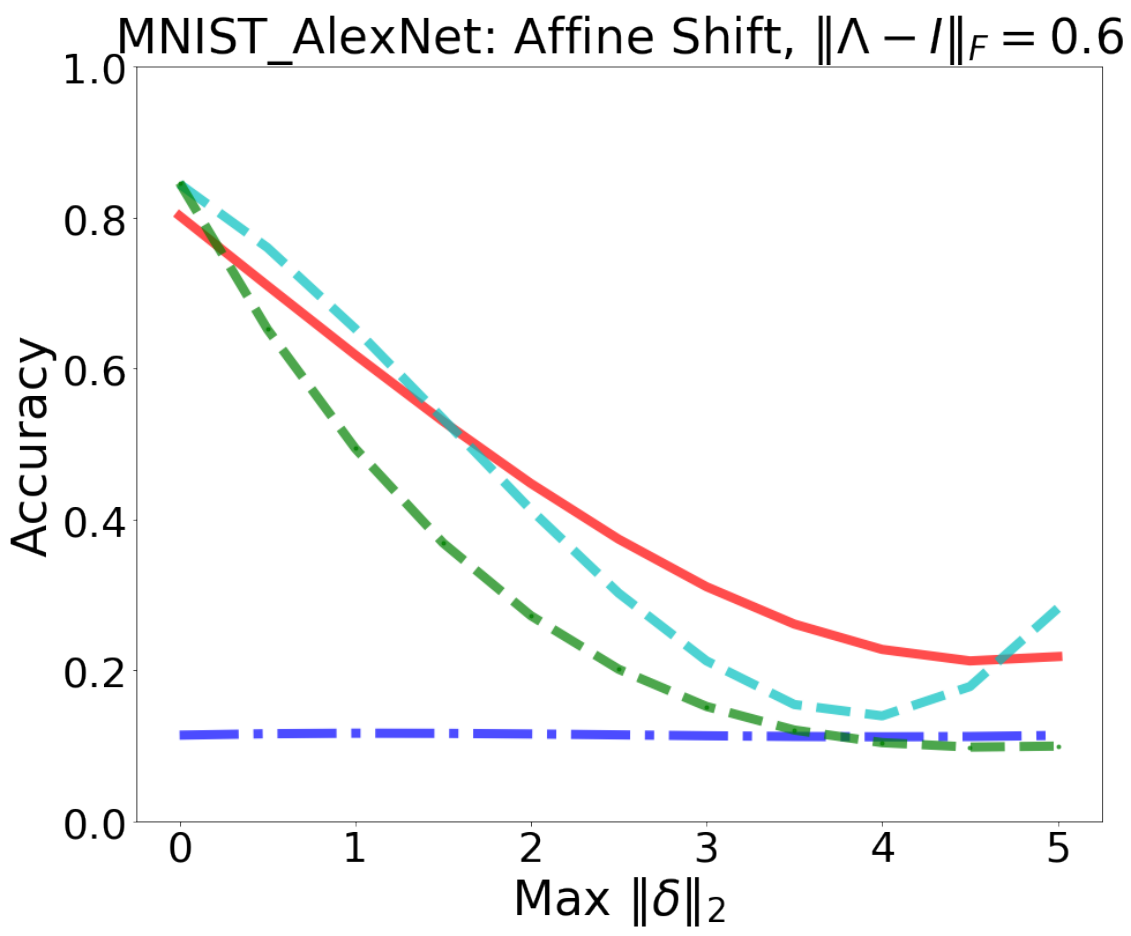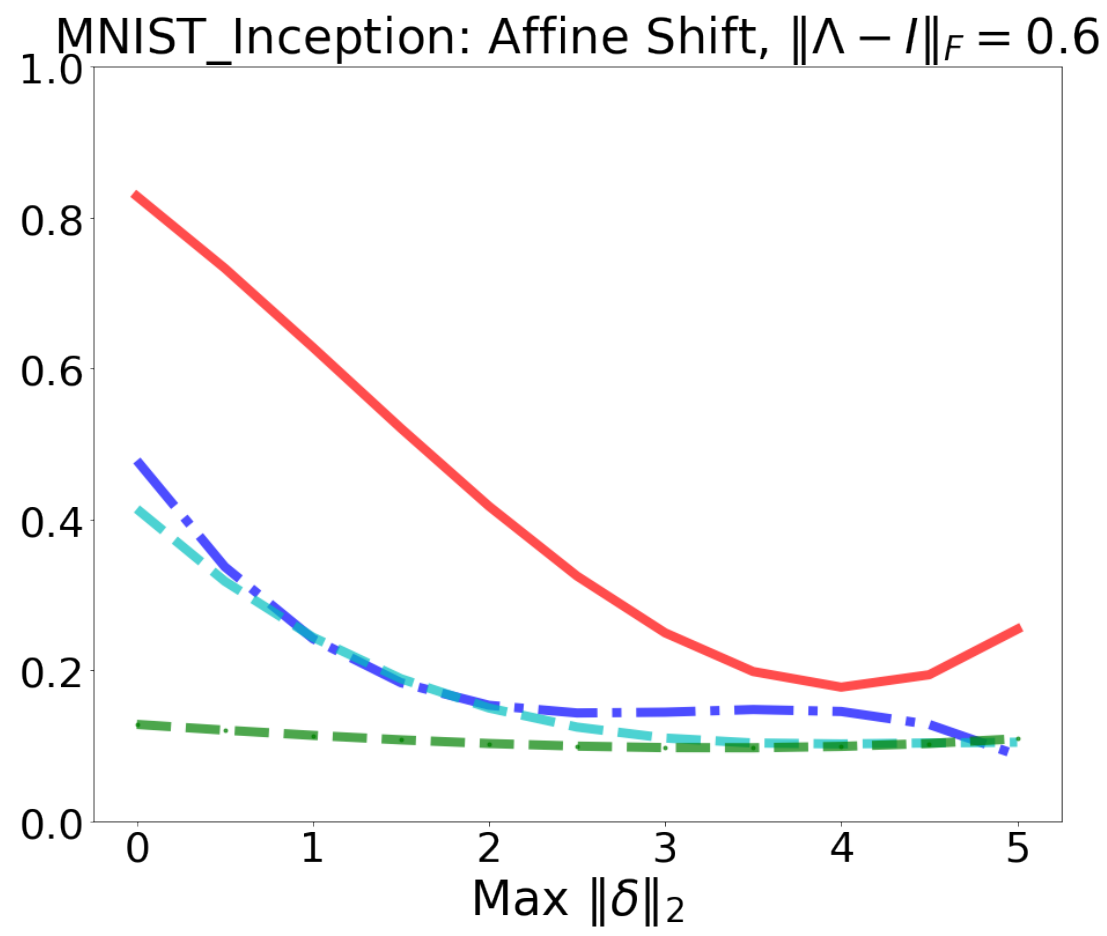

Supplement: supplementary_material [file attachment]

MNIST\_AlexNet: PGD Attack

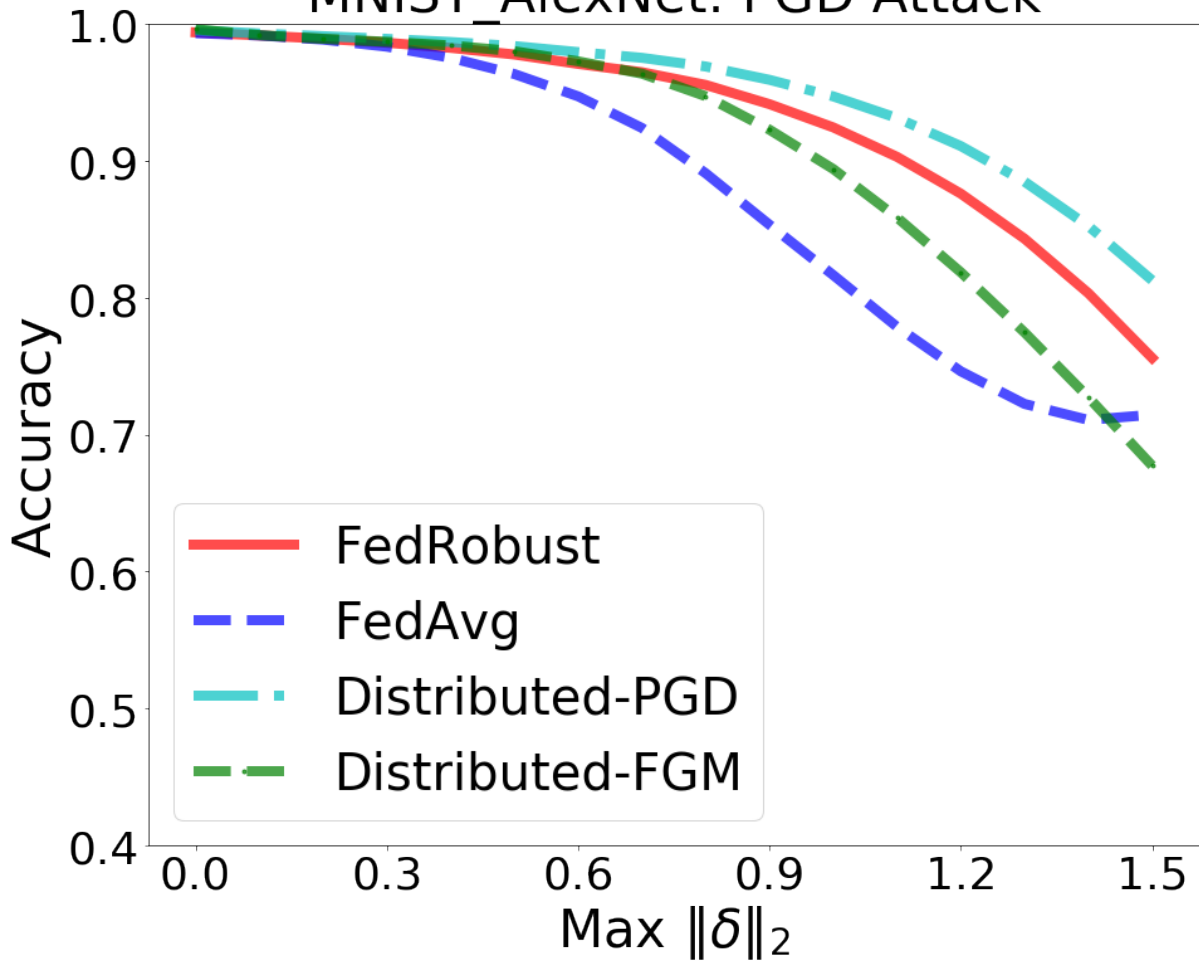

MNIST\_Inception: PGD Attack

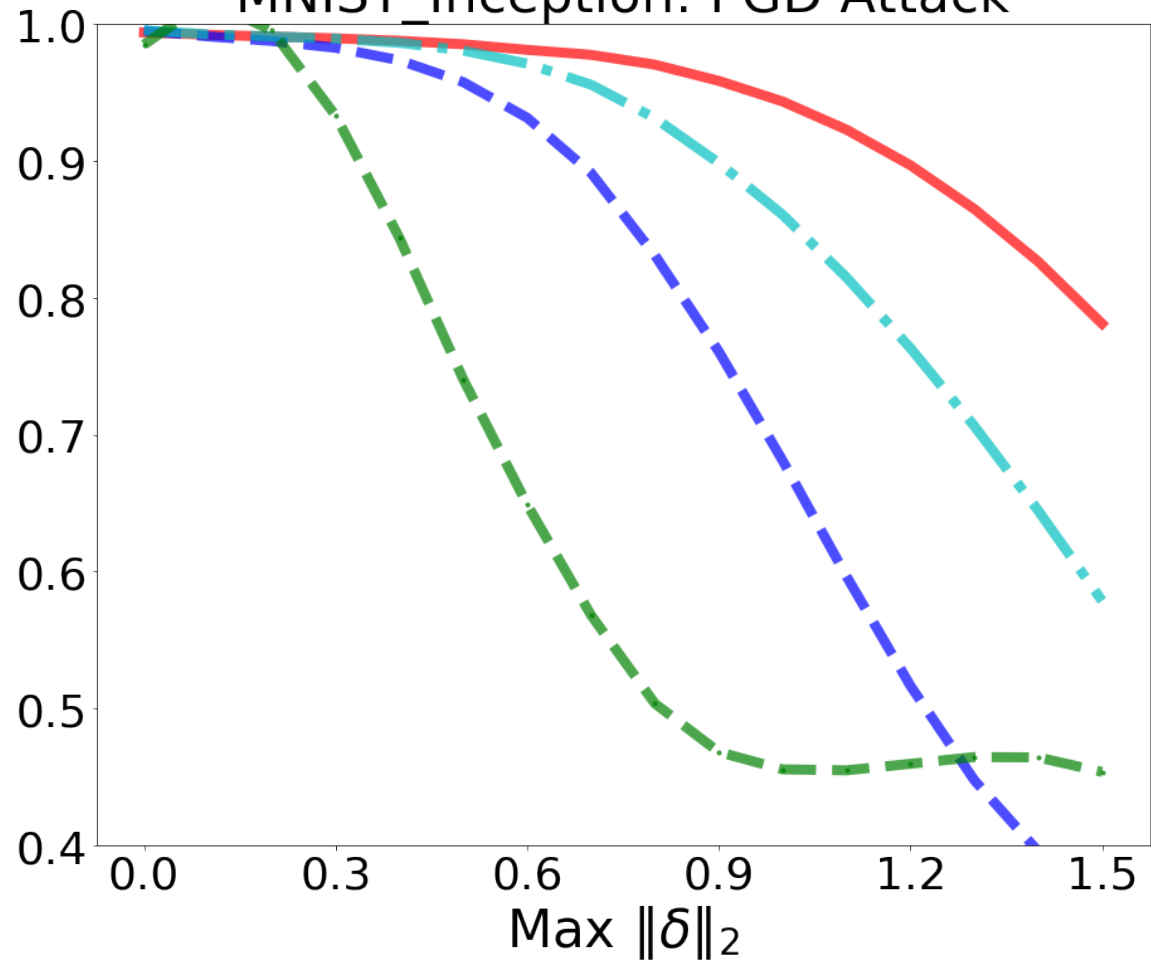

Supplement: supplementary_material [file attachment]

CIFAR\_AlexNet: PGD Attack

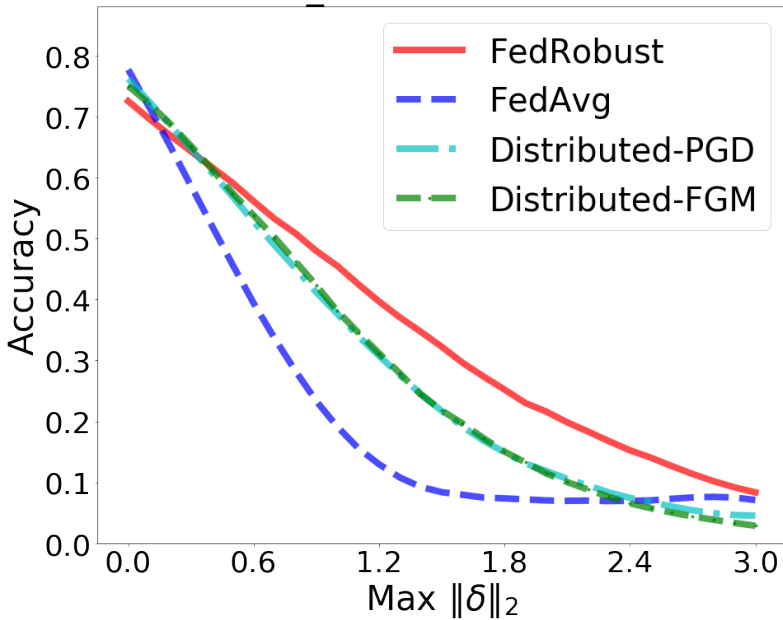

CIFAR\_Inception: PGD Attack

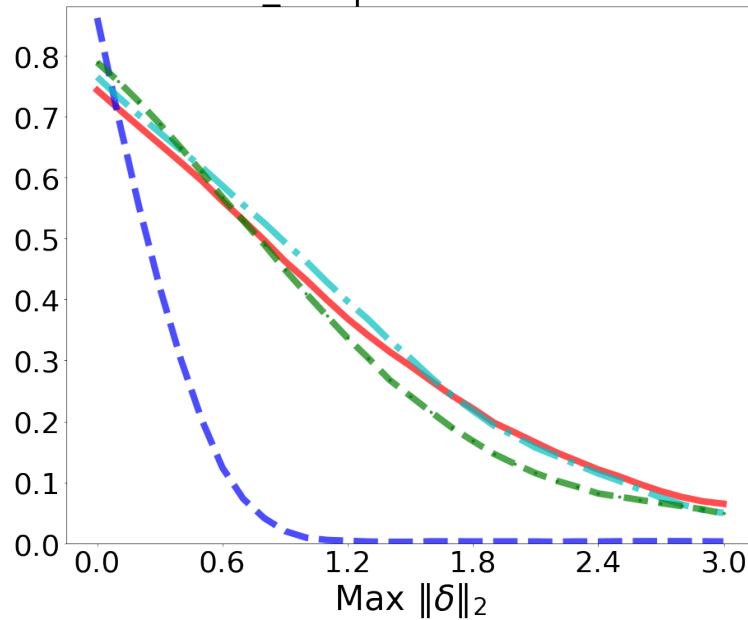

CIFAR\_ResNet: PGD Attack

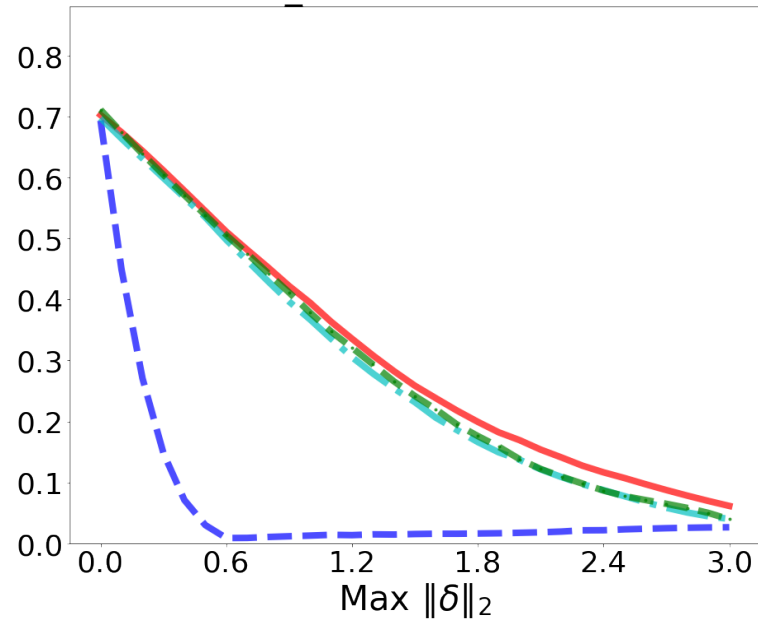

Supplement: supplementary_material [file attachment]
